# Supplementary material for: A Decade of Variety Testing for Resistance of Red Clover to Southern Anthracnose (Colletotrichum trifolii Bain et Essary) at the Bavarian State Research Center for Agriculture (LfL)
Source: MDPI journal article supplement (doi:10.3390/agriculture12020249), 2022-02-09
Supplement: s1 [file s1]

**Table S1.** Artificial inoculation trials in the greenhouse - Tested varieties of red clover (*Trifolium pratense*) their BSA-codes and years they were tested

| BSA-Code | variety            | year |      |      |      |      |      |      |      |      |      |      |      |
|----------|--------------------|------|------|------|------|------|------|------|------|------|------|------|------|
|          |                    | 2010 | 2011 | 2012 | 2013 | 2014 | 2015 | 2016 | 2017 | 2018 | 2019 | 2020 | 2021 |
| 4        | Odenwälder Rotklee | x    | x    |      |      |      | x    | x    | x    |      |      |      |      |
| 14       | Heges Hohenheimer  | x    | x    |      |      |      |      |      |      |      |      |      |      |
| 34       | Lucrum             | x    | x    |      |      |      | x    | x    | x    |      |      |      |      |
| 53       | Rotra              |      | x    |      |      |      |      |      |      |      |      |      |      |
| 83       | Kvarta             | x    | x    | x    | x    | x    | x    |      |      |      |      |      |      |
| 53       | Rotra              | x    |      |      |      |      |      |      |      |      |      |      |      |
| 85       | Merviot            |      |      |      |      |      |      | x    |      |      |      |      |      |
| 92       | Nemaro             | x    | x    |      | x    | x    | x    |      |      |      | x    | x    | x    |
| 105      | Titus              | x    | x    | x    | x    |      | x    | x    | x    |      |      |      |      |
| 105      | Titus - recurr.    |      |      |      |      |      |      |      | x    | x    | x    | x    | x    |
| 108      | Tempus             | x    | x    |      | x    | x    | x    |      |      |      |      |      |      |
| 117      | Pirat              | x    | x    | x    |      |      |      |      |      |      |      |      |      |
| 122      | Maro               | x    | x    | x    |      |      | x    |      |      |      |      |      | x    |
| 133      | Milvus             | x    | x    |      | x    | x    | x    | x    | x    | x    | x    | x    | x    |
| 135      | Mars               | x    | x    |      | x    | x    | x    |      |      |      |      |      |      |
| 156      | Montana            | x    | x    |      |      |      | x    |      |      |      |      |      |      |
| 160      | Amos               | x    |      |      |      |      |      |      |      |      |      |      |      |
| 162      | Lemmon             | x    | x    |      |      |      | x    |      |      |      |      |      |      |
| 169      | Larus              | x    | x    |      | x    | x    | x    |      |      |      |      |      | x    |
| 173      | Diplomat           | x    | x    | x    |      |      | x    |      |      |      |      |      | x    |
| 183      | Global             | x    | x    |      |      |      |      |      | x    | x    | x    | x    |      |
| 188      | Astur              | x    | x    | x    |      | x    | x    |      |      |      |      |      |      |
| 189      | Merula             | x    | x    | x    | x    | x    | x    | x    | x    |      |      |      |      |
| 191      | Pavo               | x    | x    | x    | x    | x    | x    | x    | x    |      |      |      |      |
| 201      | Taifun             | x    | x    |      | x    | x    | x    |      |      |      |      |      | x    |
| 216      | Atlantis           | x    | x    |      |      |      | x    | x    |      |      |      |      |      |
| 219      | Elanus             | x    | x    | x    |      | x    | x    |      | x    | x    | x    | x    | x    |
| 239      | Harmonie           | x    | x    |      |      |      | x    | x    | x    | x    | x    | x    | x    |
| 243      | Fregata            |      |      |      |      |      | x    | x    | x    | x    | x    | x    | x    |
| 244      | Regent             | x    | x    |      | x    |      | x    |      |      |      | x    | x    | x    |
| 250      | Magellan           | x    | x    | x    | x    | x    | x    |      |      |      | x    | x    | x    |
| 254      | Kontiki            |      |      | x    | x    | x    | x    | x    |      |      |      |      |      |
| 257      | Tornado            |      |      | x    | x    | x    | x    |      |      | x    | x    | x    | x    |
| 260      | Hurrikan           |      | x    |      |      |      |      |      |      |      |      |      |      |
| 262      | Avisto             |      |      |      |      |      | x    | x    | x    | x    | x    | x    | x    |
| 263      | Avanti             |      |      |      | x    | x    | x    |      | x    |      |      |      |      |
| 269      | Monsun             |      |      | x    | x    | x    | x    | x    | x    | x    | x    | x    | x    |
| 281      | Semperina          |      |      |      | x    | x    | x    | x    | x    | x    | x    | x    | x    |
| 295      | Loreley            |      |      |      |      | x    | x    | x    | x    | x    | x    | x    | x    |
| 296      | Saphir             |      |      |      |      | x    | x    | x    | x    | x    | x    | x    | x    |
| 314      | Columba            |      |      |      |      |      | x    | x    | x    | x    | x    | x    | x    |
| 328      | Blizard            |      |      |      |      |      | x    | x    | x    | x    | x    | x    | x    |
| 360      | Aristoteles        |      |      |      |      |      |      |      | x    | x    | x    | x    | x    |
| 368      | Kallichore         |      |      |      |      |      |      |      |      | x    | x    | x    | x    |
| 369      | Megalic            |      |      |      |      |      |      |      |      | x    | x    | x    | x    |
| 373      | Osmia              |      |      |      |      |      |      |      |      |      |      | x    | x    |
| XXX      | Violetta           |      |      |      |      |      |      |      | x    | x    |      |      |      |

**Table S2.** Artificial inoculation trials in the greenhouse - Tested varieties of alfalfa (*Medicago sativa*) their BSA-codes and years they were tested

[illegible]
